# Supplementary material
Source: Springer Nature journal article supplement (https://www.springermedizin.de/resource/supplementary/12958_2012_987_MOESM10_ESM.pdf/9566568)
Supplement: MOESM10 [file 9566568]

| Treatment          | The relationship and the changes |          |         |            |                 |
|--------------------|----------------------------------|----------|---------|------------|-----------------|
|                    | <i>c-src</i> →                   | p-PI3K → | p-PKC → | p-EPK1/2 → | follicle growth |
| <i>c-src</i> siRNA | ↓                                | ↓        | ↓       | ↓          | ↓               |
| LY294002           | —                                | ↓        | ↓       | ↓          | ↓               |
| Calphostin         | —                                | —        | ↓       | ↓          | ↓               |
| PD98059            | —                                | —        | —       | ↓          | ↓               |
